# Supplementary material for: Specific Gravity Improves Identification of Clinically Significant Quantitative Proteinuria from the Dipstick Urinalysis
Source: PubMed Central journal article supplement — Kidney360. 2024 Apr 26;5(6):851–9. doi: 10.34067/KID.0000000000000452 (PMC11219112; doi:10.34067/kid.0000000000000452), 2024-04-26
Supplement: kidney360-5-851-s002.pdf [file kidney360-5-851-s002.pdf]

**Supplemental Table 1. LOINC codes used to identify UACR, UPCR, DSP, and specific gravity**

| <b>LOINC Code</b>       | <b>Description</b>                                     |
|-------------------------|--------------------------------------------------------|
| <b>UACR</b>             |                                                        |
| 14959-1                 | Microalbumin/Creatinine [Mass Ratio] in Urine          |
| <b>UPCR</b>             |                                                        |
| 2890-2                  | Protein/Creatinine [Mass Ratio] in Urine               |
| 2161-8                  | Creatinine [Mass/volume] in Urine                      |
| 2888-6                  | Protein [Mass/volume] in Urine                         |
| <b>DSP</b>              |                                                        |
| 50561-0                 | Protein [Mass/volume] in Urine by Automated test strip |
| <b>Specific Gravity</b> |                                                        |
| 50562-8                 | Specific gravity of Urine by Refractometry automated   |
| <b>Creatinine</b>       |                                                        |
| 2160-0                  | Creatinine [Mass/volume] in Serum or Plasma            |
| 38483-4                 | Creatinine [Mass/volume] in Blood                      |

Abbreviations: DSP, dipstick urinalysis proteinuria; LOINC, Logical Observation Identifier Names and Codes; UACR, urine albumin to creatinine ratio; UPCR, urine protein to creatinine ratio.

**Supplemental Table 2a. Model performance for detecting proteinuria from DSP alone**

| <b>Metric<br/>(95% CI)</b> | <b>Overall<br/>N= 11,229</b> | <b>eGFR ≥90<br/>N= 3,161</b>            | <b>eGFR 60-89<br/>N= 2,961</b>          | <b>eGFR 45-59<br/>N= 1,389</b>        | <b>eGFR 30-44<br/>N= 1,131</b>      | <b>eGFR 15-29<br/>N= 746</b>      | <b>eGFR &lt;15<br/>N= 334</b> |
|----------------------------|------------------------------|-----------------------------------------|-----------------------------------------|---------------------------------------|-------------------------------------|-----------------------------------|-------------------------------|
| Sensitivity                | 0.61<br>(0.59, 0.62)         | 0.47 <sup>a,b,c,d</sup><br>(0.43, 0.51) | 0.50 <sup>f,g,h</sup><br>(0.46, 0.53)   | 0.56 <sup>i,j,k</sup><br>(0.52, 0.60) | 0.68 <sup>m</sup><br>(0.64, 0.72)   | 0.75 <sup>n</sup><br>(0.71, 0.78) | 0.91<br>(0.87, 0.94)          |
| Specificity                | 0.89<br>(0.88, 0.90)         | 0.88<br>(0.87, 0.89)                    | 0.90<br>(0.89, 0.92)                    | 0.90<br>(0.88, 0.92)                  | 0.89<br>(0.86, 0.91)                | 0.85<br>(0.80, 0.90)              | 0.74<br>(0.56, 0.92)          |
| Positive Predictive value  | 0.76<br>(0.74, 0.77)         | 0.55 <sup>a,b,c,d</sup><br>(0.52, 0.59) | 0.63 <sup>e,f,g,h</sup><br>(0.59, 0.67) | 0.80 <sup>i,j,k</sup><br>(0.76, 0.84) | 0.88 <sup>m</sup><br>(0.86, 0.91)   | 0.94 <sup>n</sup><br>(0.92, 0.96) | 0.98<br>(0.96, 1.00)          |
| Negative Predictive Value  | 0.80<br>(0.79, 0.81)         | 0.84 <sup>a,b,c,d</sup><br>(0.83, 0.86) | 0.84 <sup>e,f,g,h</sup><br>(0.83, 0.86) | 0.75 <sup>i,j,k</sup><br>(0.72, 0.77) | 0.68 <sup>l,m</sup><br>(0.65, 0.72) | 0.53<br>(0.47, 0.58)              | 0.37<br>(0.23, 0.51)          |
| Positive Likelihood Ratio  | 5.48<br>(5.09, 5.86)         | 3.93<br>(3.41, 4.45)                    | 5.11<br>(4.36, 5.86)                    | 5.66<br>(4.42, 6.90)                  | 5.88<br>(4.41, 7.35)                | 4.94<br>(3.23, 6.64)              | 3.48<br>(1.08, 5.87)          |
| Negative Likelihood Ratio  | 0.44<br>(0.42, 0.46)         | 0.60 <sup>a,b,c,d</sup><br>(0.56, 0.64) | 0.56 <sup>f,g,h</sup><br>(0.52, 0.60)   | 0.49 <sup>i,j,k</sup><br>(0.44, 0.53) | 0.36 <sup>m</sup><br>(0.32, 0.41)   | 0.30 <sup>n</sup><br>(0.25, 0.34) | 0.13<br>(0.07, 0.18)          |

Abbreviations: DSP, dipstick proteinuria; eGFR, estimated glomerular function rate, ml/min/1.73 m<sup>2</sup>.

<sup>a</sup>*P* <0.05 for comparison of eGFR ≥90 and eGFR 45-59.

<sup>b</sup>*P* <0.05 for comparison of eGFR ≥90 and eGFR 30-44.

<sup>c</sup>*P* <0.05 for comparison of eGFR ≥90 and eGFR 15-29.

<sup>d</sup>*P* <0.05 for comparison of eGFR ≥90 and eGFR <15.

<sup>e</sup>*P* <0.05 for comparison of eGFR 60-89 and eGFR 45-59.

<sup>f</sup>*P* <0.05 for comparison of eGFR 60-89 and eGFR 30-44.

<sup>g</sup>*P* <0.05 for comparison of eGFR 60-89 and eGFR 15-29.

<sup>h</sup>*P* <0.05 for comparison of eGFR 60-89 and eGFR <15.

<sup>i</sup>*P* <0.05 for comparison of eGFR 45-59 and eGFR 30-44.

<sup>j</sup>*P* <0.05 for comparison of eGFR 45-59 and eGFR 15-29.

<sup>k</sup>*P* <0.05 for comparison of eGFR 45-59 and eGFR <15.

<sup>l</sup>*P* <0.05 for comparison of eGFR 30-44 and eGFR 15-29.

<sup>m</sup>*P* <0.05 for comparison of eGFR 30-44 and GFR <15.

<sup>n</sup>*P* <0.05 for comparison of eGFR 15-29 and GFR <15.

There were no *P*<0.05 in comparisons between eGFR ≥90 vs eGFR 60-89

Bootstrap percentile-based confidence interval was obtained from 2000 bootstrap samples for all CI. *P* value was adjusted with Holm's method.

**Supplemental Table 2b. Model performance for detecting proteinuria from DSP and specific gravity by eGFR categories.**

| <b>Metric<br/>(95% CI)</b> | <b>Overall<br/>N= 11,229</b> | <b>eGFR ≥90<br/>N= 3,161</b>            | <b>eGFR 60-89<br/>N= 2,961</b>           | <b>eGFR 45-59<br/>N= 1,389</b>       | <b>eGFR 30-44<br/>N= 1,131</b>    | <b>eGFR 15-29<br/>N= 746</b> | <b>eGFR &lt;15<br/>N= 334</b> |
|----------------------------|------------------------------|-----------------------------------------|------------------------------------------|--------------------------------------|-----------------------------------|------------------------------|-------------------------------|
| Sensitivity                | 0.57<br>(0.56, 0.60)         | 0.47 <sup>d</sup><br>(0.42, 0.67)       | 0.66<br>(0.59, 0.70)                     | 0.56<br>(0.50, 0.65)                 | 0.65<br>(0.60, 0.67)              | 0.72<br>(0.66, 0.77)         | 0.89<br>(0.72, 0.98)          |
| Specificity                | 0.94<br>(0.92, 0.95)         | 0.90<br>(0.69, 0.95)                    | 0.78 <sup>f,g</sup><br>(0.77, 0.85)      | 0.92<br>(0.85, 0.97)                 | 0.93<br>(0.91, 0.97)              | 0.91<br>(0.87, 0.97)         | 0.78<br>(0.65, 0.96)          |
| Positive Predictive value  | 0.85<br>(0.81, 0.87)         | 0.59 <sup>a,b,c,d</sup><br>(0.41, 0.72) | 0.50 <sup>e,f,g,h</sup><br>(0.49, 0.57)  | 0.83 <sup>j,k</sup><br>(0.74, 0.92)  | 0.93 <sup>m</sup><br>(0.90, 0.96) | 0.96<br>(0.95, 0.98)         | 0.98<br>(0.97, 1.00)          |
| Negative Predictive Value  | 0.80<br>(0.79, 0.80)         | 0.84 <sup>a,b,c,d</sup><br>(0.84, 0.87) | 0.878 <sup>e,f,g,h</sup><br>(0.86, 0.89) | 0.748 <sup>i,j</sup><br>(0.73, 0.77) | 0.68 <sup>l</sup><br>(0.65, 0.70) | 0.52<br>(0.48, 0.57)         | 0.34<br>(0.19, 0.77)          |
| Positive Likelihood Ratio  | 10.10<br>(7.39, 12.11)       | 4.60<br>(2.18, 8.15)                    | 3.031 <sup>f,g</sup><br>(2.82, 3.95)     | 7.121<br>(4.04, 16.05)               | 9.75<br>(7.12, 20.94)             | 8.35<br>(5.72, 20.78)        | 4.08<br>(2.60, 12.60)         |
| Negative Likelihood Ratio  | 0.45<br>(0.43, 0.47)         | 0.59 <sup>b,c,d</sup><br>(0.47, 0.63)   | 0.430 <sup>g,h</sup><br>(0.39, 0.49)     | 0.48 <sup>i,k</sup><br>(0.42, 0.53)  | 0.37<br>(0.33, 0.42)              | 0.30<br>(0.25, 0.36)         | 0.14<br>(0.02, 0.31)          |

Abbreviations: DSP, dipstick proteinuria; eGFR, estimated glomerular function rate, ml/min/1.73 m<sup>2</sup>.

<sup>a</sup>P <0.05 for comparison of eGFR ≥90 and eGFR 45-59.

<sup>b</sup>P <0.05 for comparison of eGFR ≥90 and eGFR 30-44.

<sup>c</sup>P <0.05 for comparison of eGFR ≥90 and eGFR 15-29.

<sup>d</sup>P <0.05 for comparison of eGFR ≥90 and eGFR <15.

<sup>e</sup>P <0.05 for comparison of eGFR 60-89 and eGFR 45-59.

<sup>f</sup>P <0.05 for comparison of eGFR 60-89 and eGFR 30-44.

<sup>g</sup>P <0.05 for comparison of eGFR 60-89 and eGFR 15-29.

<sup>h</sup>P <0.05 for comparison of eGFR 60-89 and eGFR <15.

<sup>i</sup>P <0.05 for comparison of eGFR 45-59 and eGFR 30-44.

<sup>j</sup>P <0.05 for comparison of eGFR 45-59 and eGFR 15-29.

<sup>k</sup>P <0.05 for comparison of eGFR 45-59 and eGFR <15.

<sup>l</sup>P <0.05 for comparison of eGFR 30-44 and eGFR 15-29.

<sup>m</sup>P <0.05 for comparison of eGFR 30-44 and GFR <15.

There were no P<0.05 in comparisons between eGFR ≥90 vs eGFR 60-89 and eGFR 15-29 vs eGFR <15.

Bootstrap percentile-based confidence interval was obtained from 2000 bootstrap samples for all CI. *P* value was adjusted with Holm's method.

Supplemental Figure 1.

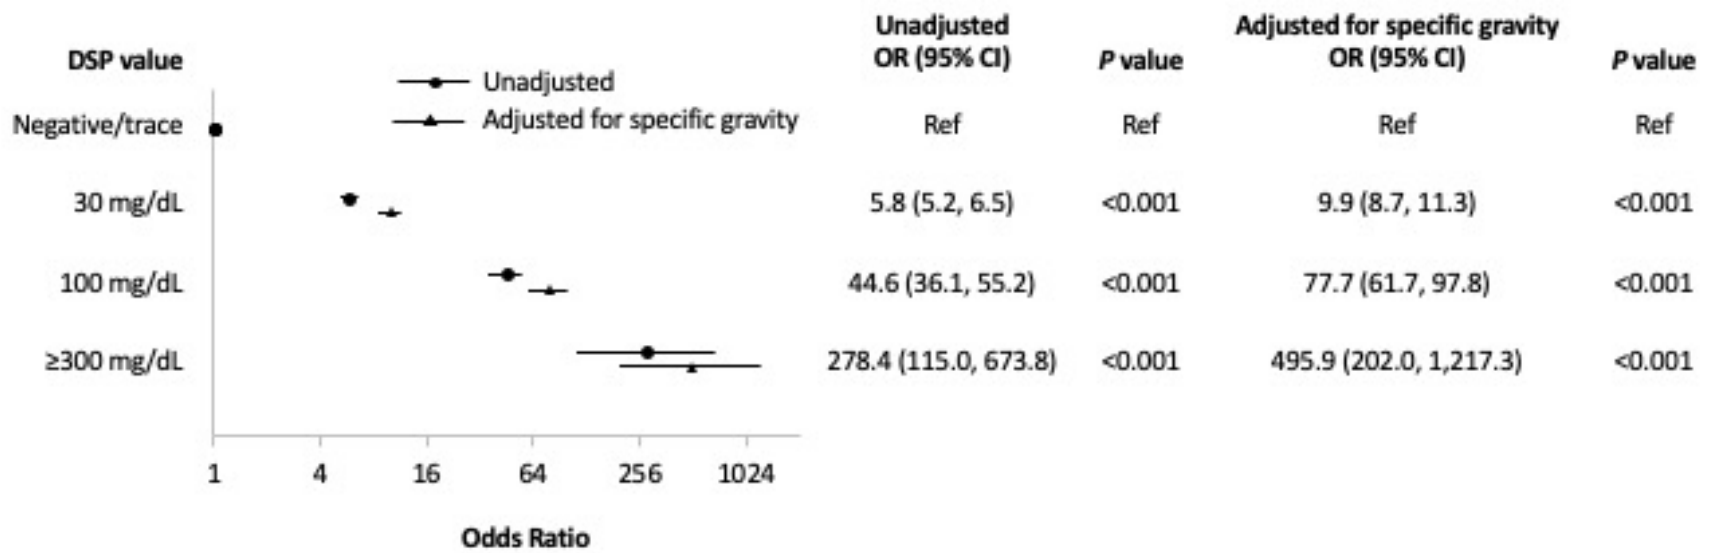

## Supplemental Figure Legend

**Supplemental Figure 1.** Increasing levels of DSP in univariable models and when adjusting for specific gravity were associated with clinically significant proteinuria. Circles represent unadjusted models and triangles represent models adjusted for specific gravity. As compared with unadjusted models, adjustment for specific gravity increased the odds ratios for clinically significant proteinuria at each level of DSP.
